# Supplementary material for: Opening Wedge High Tibial Osteotomy and Anterior Cruciate Ligament Reconstruction or Revision
Source: PubMed Central journal article supplement — Arthrosc Tech. 2017 Oct 2;6(5):e1735–41. doi: 10.1016/j.eats.2017.06.044 (PMC5793895; doi:10.1016/j.eats.2017.06.044), 2017-10-02
Supplement: mmc2.pdf [file mmc2.pdf]

# ICMJE Form for Disclosure of Potential Conflicts of Interest

## Section 1. Identifying Information

1. Given Name **Anna** \_\_\_\_\_ 2. Surname **Palazzolo**
3. Are you the corresponding author? Yes \_ No
4. Effective Date 3/11/2017 \_\_\_\_\_
5. Manuscript Title **OPENING WEDGE HIGH TIBIAL OSTEOTOMY AND ACL RECONSTRUCTION/REVISION**

## Section 2. The Work Under Consideration for Publication

Did you or your institution at any time receive payment or services from a third party for any aspect of the submitted work (including but not limited to grants, data monitoring board, study design, manuscript preparation, statistical analysis, etc...)?

Complete each item by typing an X in answer yes or not and completing the information requested if an answer is Yes. If you have more than one relationship, add lines.

### 1. Grant

X  No \_\_\_ Yes, money paid to you \_\_\_ Yes, money paid to institution\* Name of entity \_\_\_ Comments † \_\_\_

### 2. Consulting fee or honorarium

X  No \_\_\_ Yes, money paid to you \_\_\_ Yes, money paid to institution\* Name of entity \_\_\_ Comments † \_\_\_

### 3. Support for travel to meetings for the study or other purposes

X  No \_\_\_ Yes, money paid to you \_\_\_ Yes, money paid to institution\* Name of entity \_\_\_ Comments † \_\_\_

### 4. Fees for participation in review activities such as data monitoring boards, statistical analysis, end-point committees, and the like

X  No \_\_\_ Yes, money paid to you \_\_\_ Yes, money paid to institution\* Name of entity \_\_\_ Comments † \_\_\_

### 5. Payment for writing or reviewing the manuscript

X  No \_\_\_ Yes, money paid to you \_\_\_ Yes, money paid to institution\* Name of entity \_\_\_ Comments † \_\_\_

### 6. Provision of writing assistance, medicines, equipment, or administrative support

X  No \_\_\_ Yes, money paid to you \_\_\_ Yes, money paid to institution\* Name of entity \_\_\_ Comments † \_\_\_

### 7. Other

X  No \_\_\_ Yes, money paid to you \_\_\_ Yes, money paid to institution\* Name of entity \_\_\_ Comments † \_\_\_

\* This means money that your institution received for your efforts on this study.

† Use this section to provide any needed explanation.

## Section 3. Relevant financial activities outside the submitted work

1. Board membership

X\_No \_\_\_ Yes, money paid to you \_\_\_ Yes, money paid to institution\* Name of entity\_\_\_ Comments\_\_\_

2. Consultancy

X\_No \_\_\_ Yes, money paid to you \_\_\_ Yes, money paid to institution\* Name of entity\_\_\_ Comments\_\_\_

3. Employment

X\_No \_\_\_ Yes, money paid to you \_\_\_ Yes, money paid to institution\* Name of entity\_\_\_ Comments\_\_\_

4. Expert testimony

X\_No \_\_\_ Yes, money paid to you \_\_\_ Yes, money paid to institution\* Name of entity\_\_\_ Comments\_\_\_

5. Grants/grants pending

X\_No \_\_\_ Yes, money paid to you \_\_\_ Yes, money paid to institution\* Name of entity\_\_\_ Comments\_\_\_

6. Payment for lectures including service on speakers bureaus

X\_No \_\_\_ Yes, money paid to you \_\_\_ Yes, money paid to institution\* Name of entity\_\_\_ Comments\_\_\_

7. Payment for manuscript preparation

X\_No \_\_\_ Yes, money paid to you \_\_\_ Yes, money paid to institution\* Name of entity\_\_\_ Comments\_\_\_

8. Patents (planned, pending or issued)

X\_No \_\_\_ Yes, money paid to you \_\_\_ Yes, money paid to institution\* Name of entity\_\_\_ Comments\_\_\_

9. Royalties

X\_No \_\_\_ Yes, money paid to you \_\_\_ Yes, money paid to institution\* Name of entity\_\_\_ Comments\_\_\_

10. Payment for development of educational presentations

X\_No \_\_\_ Yes, money paid to you \_\_\_ Yes, money paid to institution\* Name of entity\_\_\_ Comments\_\_\_

11. Stock/stock options

X\_No \_\_\_ Yes, money paid to you \_\_\_ Yes, money paid to institution\* Name of entity\_\_\_ Comments\_\_\_

12. Travel/accommodations/ meeting expenses unrelated to activities listed\*\*

X\_No \_\_\_ Yes, money paid to you \_\_\_ Yes, money paid to institution\* Name of entity\_\_\_ Comments\_\_\_

13. Other (err on the side of full disclosure)

X\_No \_\_\_ Yes, money paid to you \_\_\_ Yes, money paid to institution\* Name of entity\_\_\_ Comments\_\_\_

\*\* For example, if you report a consultancy above there is no need to report travel related to that consultancy on this line.



# ICMJE Form for Disclosure of Potential Conflicts of Interest

## Section 1. Identifying Information

1. Given Name DAVIDE EDOARDO \_\_\_\_\_ 2. Surname BONASIA  
3. Are you the corresponding author? Yes  No   
4. Effective Date 3/11/2017 \_\_\_\_\_  
5. Manuscript Title OPENING WEDGE HIGH TIBIAL OSTEOTOMY AND ACL RECONSTRUCTION/REVISION

## Section 2. The Work Under Consideration for Publication

Did you or your institution at any time receive payment or services from a third party for any aspect of the submitted work (including but not limited to grants, data monitoring board, study design, manuscript preparation, statistical analysis, etc...)?

Complete each item by typing an X in answer yes or not and completing the information requested if an answer is Yes. If you have more than one relationship, add lines.

### 1. Grant

X  No  Yes, money paid to you  Yes, money paid to institution\* Name of entity \_\_\_\_\_ Comments † \_\_\_\_\_

### 2. Consulting fee or honorarium

X  No  Yes, money paid to you  Yes, money paid to institution\* Name of entity \_\_\_\_\_ Comments † \_\_\_\_\_

### 3. Support for travel to meetings for the study or other purposes

X  No  Yes, money paid to you  Yes, money paid to institution\* Name of entity \_\_\_\_\_ Comments † \_\_\_\_\_

### 4. Fees for participation in review activities such as data monitoring boards, statistical analysis, end-point committees, and the like

X  No  Yes, money paid to you  Yes, money paid to institution\* Name of entity \_\_\_\_\_ Comments † \_\_\_\_\_

### 5. Payment for writing or reviewing the manuscript

X  No  Yes, money paid to you  Yes, money paid to institution\* Name of entity \_\_\_\_\_ Comments † \_\_\_\_\_

### 6. Provision of writing assistance, medicines, equipment, or administrative support

X  No  Yes, money paid to you  Yes, money paid to institution\* Name of entity \_\_\_\_\_ Comments † \_\_\_\_\_

### 7. Other

X  No  Yes, money paid to you  Yes, money paid to institution\* Name of entity \_\_\_\_\_ Comments † \_\_\_\_\_

\* This means money that your institution received for your efforts on this study.

† Use this section to provide any needed explanation.

## Section 3. Relevant financial activities outside the submitted work

1. Board membership

X\_No \_\_\_ Yes, money paid to you \_\_\_ Yes, money paid to institution\* Name of entity\_\_\_ Comments\_\_\_

2. Consultancy

X\_No \_\_\_ Yes, money paid to you \_\_\_ Yes, money paid to institution\* Name of entity\_\_\_ Comments\_\_\_

3. Employment

X\_No \_\_\_ Yes, money paid to you \_\_\_ Yes, money paid to institution\* Name of entity\_\_\_ Comments\_\_\_

4. Expert testimony

X\_No \_\_\_ Yes, money paid to you \_\_\_ Yes, money paid to institution\* Name of entity\_\_\_ Comments\_\_\_

5. Grants/grants pending

X\_No \_\_\_ Yes, money paid to you \_\_\_ Yes, money paid to institution\* Name of entity\_\_\_ Comments\_\_\_

6. Payment for lectures including service on speakers bureaus

X\_No \_\_\_ Yes, money paid to you \_\_\_ Yes, money paid to institution\* Name of entity\_\_\_ Comments\_\_\_

7. Payment for manuscript preparation

X\_No \_\_\_ Yes, money paid to you \_\_\_ Yes, money paid to institution\* Name of entity\_\_\_ Comments\_\_\_

8. Patents (planned, pending or issued)

X\_No \_\_\_ Yes, money paid to you \_\_\_ Yes, money paid to institution\* Name of entity\_\_\_ Comments\_\_\_

9. Royalties

X\_No \_\_\_ Yes, money paid to you \_\_\_ Yes, money paid to institution\* Name of entity\_\_\_ Comments\_\_\_

10. Payment for development of educational presentations

X\_No \_\_\_ Yes, money paid to you \_\_\_ Yes, money paid to institution\* Name of entity\_\_\_ Comments\_\_\_

11. Stock/stock options

X\_No \_\_\_ Yes, money paid to you \_\_\_ Yes, money paid to institution\* Name of entity\_\_\_ Comments\_\_\_

12. Travel/accommodations/ meeting expenses unrelated to activities listed\*\*

X\_No \_\_\_ Yes, money paid to you \_\_\_ Yes, money paid to institution\* Name of entity\_\_\_ Comments\_\_\_

13. Other (err on the side of full disclosure)

X\_No \_\_\_ Yes, money paid to you \_\_\_ Yes, money paid to institution\* Name of entity\_\_\_ Comments\_\_\_

\*\* For example, if you report a consultancy above there is no need to report travel related to that consultancy on this line.



# ICMJE Form for Disclosure of Potential Conflicts of Interest

## Section 1. Identifying Information

1. Given Name FEDERICO \_\_\_\_\_ 2. Surname DETTONI
3. Are you the corresponding author? Yes \_ No X\_
4. Effective Date 3/11/2017 \_\_\_\_\_
5. Manuscript Title OPENING WEDGE HIGH TIBIAL OSTEOTOMY AND ACL RECONSTRUCTION/REVISION

## Section 2. The Work Under Consideration for Publication

Did you or your institution at any time receive payment or services from a third party for any aspect of the submitted work (including but not limited to grants, data monitoring board, study design, manuscript preparation, statistical analysis, etc...)?

Complete each item by typing an X in answer yes or not and completing the information requested if an answer is Yes. If you have more than one relationship, add lines.

### 1. Grant

X\_ No \_\_\_ Yes, money paid to you \_\_\_ Yes, money paid to institution\* Name of entity \_\_\_ Comments † \_\_\_

### 2. Consulting fee or honorarium

X\_ No \_\_\_ Yes, money paid to you \_\_\_ Yes, money paid to institution\* Name of entity \_\_\_ Comments † \_\_\_

### 3. Support for travel to meetings for the study or other purposes

X\_ No \_\_\_ Yes, money paid to you \_\_\_ Yes, money paid to institution\* Name of entity \_\_\_ Comments † \_\_\_

### 4. Fees for participation in review activities such as data monitoring boards, statistical analysis, end-point committees, and the like

X\_ No \_\_\_ Yes, money paid to you \_\_\_ Yes, money paid to institution\* Name of entity \_\_\_ Comments † \_\_\_

### 5. Payment for writing or reviewing the manuscript

X\_ No \_\_\_ Yes, money paid to you \_\_\_ Yes, money paid to institution\* Name of entity \_\_\_ Comments † \_\_\_

### 6. Provision of writing assistance, medicines, equipment, or administrative support

X\_ No \_\_\_ Yes, money paid to you \_\_\_ Yes, money paid to institution\* Name of entity \_\_\_ Comments † \_\_\_

### 7. Other

X\_ No \_\_\_ Yes, money paid to you \_\_\_ Yes, money paid to institution\* Name of entity \_\_\_ Comments † \_\_\_

\* This means money that your institution received for your efforts on this study.

† Use this section to provide any needed explanation.

## Section 3. Relevant financial activities outside the submitted work

1. Board membership

X\_No \_\_\_ Yes, money paid to you \_\_\_ Yes, money paid to institution\* Name of entity\_\_\_ Comments\_\_\_

2. Consultancy

X\_No \_\_\_ Yes, money paid to you \_\_\_ Yes, money paid to institution\* Name of entity\_\_\_ Comments\_\_\_

3. Employment

X\_No \_\_\_ Yes, money paid to you \_\_\_ Yes, money paid to institution\* Name of entity\_\_\_ Comments\_\_\_

4. Expert testimony

X\_No \_\_\_ Yes, money paid to you \_\_\_ Yes, money paid to institution\* Name of entity\_\_\_ Comments\_\_\_

5. Grants/grants pending

X\_No \_\_\_ Yes, money paid to you \_\_\_ Yes, money paid to institution\* Name of entity\_\_\_ Comments\_\_\_

6. Payment for lectures including service on speakers bureaus

X\_No \_\_\_ Yes, money paid to you \_\_\_ Yes, money paid to institution\* Name of entity\_\_\_ Comments\_\_\_

7. Payment for manuscript preparation

X\_No \_\_\_ Yes, money paid to you \_\_\_ Yes, money paid to institution\* Name of entity\_\_\_ Comments\_\_\_

8. Patents (planned, pending or issued)

X\_No \_\_\_ Yes, money paid to you \_\_\_ Yes, money paid to institution\* Name of entity\_\_\_ Comments\_\_\_

9. Royalties

X\_No \_\_\_ Yes, money paid to you \_\_\_ Yes, money paid to institution\* Name of entity\_\_\_ Comments\_\_\_

10. Payment for development of educational presentations

X\_No \_\_\_ Yes, money paid to you \_\_\_ Yes, money paid to institution\* Name of entity\_\_\_ Comments\_\_\_

11. Stock/stock options

X\_No \_\_\_ Yes, money paid to you \_\_\_ Yes, money paid to institution\* Name of entity\_\_\_ Comments\_\_\_

12. Travel/accommodations/ meeting expenses unrelated to activities listed\*\*

X\_No \_\_\_ Yes, money paid to you \_\_\_ Yes, money paid to institution\* Name of entity\_\_\_ Comments\_\_\_

13. Other (err on the side of full disclosure)

X\_No \_\_\_ Yes, money paid to you \_\_\_ Yes, money paid to institution\* Name of entity\_\_\_ Comments\_\_\_

\*\* For example, if you report a consultancy above there is no need to report travel related to that consultancy on this line.





# ICMJE Form for Disclosure of Potential Conflicts of Interest

## Section 1. Identifying Information

1. Given Name **Roberto** \_\_\_\_\_ 2. Surname **Rossi**
3. Are you the corresponding author? Yes \_ No **X**\_
4. Effective Date **3/11/2017** \_\_\_\_\_
5. Manuscript Title **OPENING WEDGE HIGH TIBIAL OSTEOTOMY AND ACL RECONSTRUCTION/REVISION**

## Section 2. The Work Under Consideration for Publication

Did you or your institution at any time receive payment or services from a third party for any aspect of the submitted work (including but not limited to grants, data monitoring board, study design, manuscript preparation, statistical analysis, etc...)?

Complete each item by typing an X in answer yes or not and completing the information requested if an answer is Yes. If you have more than one relationship, add lines.

### 1. Grant

X  No \_\_\_ Yes, money paid to you \_\_\_ Yes, money paid to institution\* Name of entity \_\_\_ Comments † \_\_\_

### 2. Consulting fee or honorarium

X  No \_\_\_ Yes, money paid to you \_\_\_ Yes, money paid to institution\* Name of entity \_\_\_ Comments † \_\_\_

### 3. Support for travel to meetings for the study or other purposes

X  No \_\_\_ Yes, money paid to you \_\_\_ Yes, money paid to institution\* Name of entity \_\_\_ Comments † \_\_\_

### 4. Fees for participation in review activities such as data monitoring boards, statistical analysis, end-point committees, and the like

X  No \_\_\_ Yes, money paid to you \_\_\_ Yes, money paid to institution\* Name of entity \_\_\_ Comments † \_\_\_

### 5. Payment for writing or reviewing the manuscript

X  No \_\_\_ Yes, money paid to you \_\_\_ Yes, money paid to institution\* Name of entity \_\_\_ Comments † \_\_\_

### 6. Provision of writing assistance, medicines, equipment, or administrative support

X  No \_\_\_ Yes, money paid to you \_\_\_ Yes, money paid to institution\* Name of entity \_\_\_ Comments † \_\_\_

### 7. Other

X  No \_\_\_ Yes, money paid to you \_\_\_ Yes, money paid to institution\* Name of entity \_\_\_ Comments † \_\_\_

\* This means money that your institution received for your efforts on this study.

† Use this section to provide any needed explanation.

## Section 3. Relevant financial activities outside the submitted work

1. Board membership

X\_No \_\_\_ Yes, money paid to you \_\_\_ Yes, money paid to institution\* Name of entity\_\_\_ Comments\_\_\_

2. Consultancy

X\_No \_\_\_ Yes, money paid to you \_\_\_ Yes, money paid to institution\* Name of entity\_\_\_ Comments\_\_\_

3. Employment

X\_No \_\_\_ Yes, money paid to you \_\_\_ Yes, money paid to institution\* Name of entity\_\_\_ Comments\_\_\_

4. Expert testimony

X\_No \_\_\_ Yes, money paid to you \_\_\_ Yes, money paid to institution\* Name of entity\_\_\_ Comments\_\_\_

5. Grants/grants pending

X\_No \_\_\_ Yes, money paid to you \_\_\_ Yes, money paid to institution\* Name of entity\_\_\_ Comments\_\_\_

6. Payment for lectures including service on speakers bureaus

  No   X\_ Yes, money paid to you \_\_\_ Yes, money paid to institution\* Name of entity\_\_\_ Comments  
PART OF THE TEACHING PROGRAM FOR ZIMMER-BIOMET AND SMITH AND NEPHEW \_\_\_

7. Payment for manuscript preparation

X\_No \_\_\_ Yes, money paid to you \_\_\_ Yes, money paid to institution\* Name of entity\_\_\_ Comments\_\_\_

8. Patents (planned, pending or issued)

X\_No \_\_\_ Yes, money paid to you \_\_\_ Yes, money paid to institution\* Name of entity\_\_\_ Comments\_\_\_

9. Royalties

X\_No \_\_\_ Yes, money paid to you \_\_\_ Yes, money paid to institution\* Name of entity\_\_\_ Comments\_\_\_

10. Payment for development of educational presentations

X\_No \_\_\_ Yes, money paid to you \_\_\_ Yes, money paid to institution\* Name of entity\_\_\_ Comments\_\_\_

11. Stock/stock options

X\_No \_\_\_ Yes, money paid to you \_\_\_ Yes, money paid to institution\* Name of entity\_\_\_ Comments\_\_\_

12. Travel/accommodations/ meeting expenses unrelated to activities listed\*\*

X\_No \_\_\_ Yes, money paid to you \_\_\_ Yes, money paid to institution\* Name of entity\_\_\_ Comments\_\_\_

13. Other (err on the side of full disclosure)

X\_No \_\_\_ Yes, money paid to you \_\_\_ Yes, money paid to institution\* Name of entity\_\_\_ Comments\_\_\_

\*\* For example, if you report a consultancy above there is no need to report travel related to that consultancy on this line.
